# Supplementary material for: A graph-based genetic algorithm and generative model/Monte Carlo tree search for the exploration of chemical space
Source: Royal Society of Chemistry journal article supplement (doi:10.1039/c8sc05372c), 2019-01-01
Supplement: c8sc05372c1.pdf [file c8sc05372c1.pdf]

## SUPPORTING INFORMATION

**Table S1.** Probability of a bonds, where the second atom is not in a ring, in the first 1000 molecules in the ZINC dataset.

| bond | prob.  | bond | prob. |
|------|--------|------|-------|
| C-C  | 37.87% | C≡N  | 0.41% |
| C-N  | 14.07% | N-N  | 0.33% |
| N-C  | 13.76% | N-O  | 0.31% |
| C=O  | 8.28%  | S-N  | 0.30% |
| C-O  | 7.96%  | O-N  | 0.29% |
| O-C  | 4.83%  | N=O  | 0.25% |
| C-S  | 2.27%  | C=N  | 0.23% |
| C-F  | 2.23%  | C=S  | 0.18% |
| S=O  | 1.62%  | N=C  | 0.15% |
| C-Cl | 1.44%  | C≡C  | 0.12% |
| S-C  | 1.10%  | S=C  | 0.06% |
| C=C  | 0.91%  | O-S  | 0.02% |
| N-S  | 0.56%  | S-O  | 0.02% |
| C-Br | 0.41%  | C-I  | 0.01% |

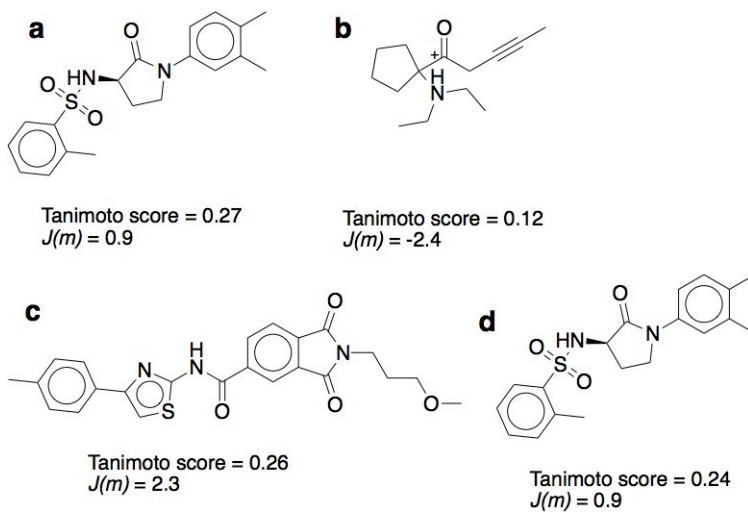

**Figure S1.** Molecules from the ZINC data set with the highest Tanimoto similarity to the molecules shown in Figure 3, together with their  $J(m)$  values. The Tanimoto score is calculated using ECFP4 fingerprints.
